# Supplementary material for: Effects of Ventilation Improvement on Measured and Perceived Indoor Air Quality in a School Building with a Hybrid Ventilation System
Source: PubMed Central journal article supplement (PMC6068750; doi:10.3390/ijerph15071414), 2018-07-05
Supplement: ijerph-15-01414-s001.pdf [file ijerph-15-01414-s001.pdf]

**Table S1.** Indoor air questionnaire (Finnish Institute of Occupational Health© 2006–2008, version 2.0) results from May 2016 and January 2017.

|                                                          | Reference data | Building Section 1 |      | <i>p</i> -Value | Building Section 2 |      | <i>p</i> -Value |
|----------------------------------------------------------|----------------|--------------------|------|-----------------|--------------------|------|-----------------|
|                                                          | [1-3]          | 2016               | 2017 |                 | 2016               | 2017 |                 |
| <b>Background information</b>                            |                |                    |      |                 |                    |      |                 |
| Number of answers                                        |                | 15                 | 16   |                 | 16                 | 17   |                 |
| Response rate (%)                                        | 71             | 79                 | 80   |                 | 84                 | 85   |                 |
| Females (%)                                              | 21             | 87                 | 88   |                 | 94                 | 94   |                 |
| Daily smokers (%)                                        |                | 13                 | 6    |                 | 0                  | 0    |                 |
| Average age (years)                                      |                | 41                 | 42   |                 | 41                 | 38   |                 |
| Average employment in this work place (years)            |                | 5                  | 5    |                 | 4                  | 4    |                 |
| <b>Work environment (%)</b>                              |                |                    |      |                 |                    |      |                 |
|                                                          |                | %                  | %    |                 |                    |      |                 |
| Draught                                                  | 22             | 7                  | 44   | 0.04*           | 13                 | 47   | 0.06*           |
| Room temperature too high                                | 17             | 0                  | 0    | -               | 0                  | 6    | 1.00*           |
| Varying temperature                                      | 16             | 20                 | 31   | 0.69*           | 19                 | 27   | 0.69*           |
| Room temperature too low                                 | 13             | 27                 | 56   | 0.10            | 19                 | 53   | 0.04            |
| Stuffy air                                               | 34             | 53                 | 38   | 0.38            | 80                 | 71   | 0.69*           |
| Dry air                                                  | 35             | 13                 | 44   | 0.11*           | 14                 | 41   | 0.13*           |
| Insufficient ventilation                                 | 32             | 47                 | 31   | 0.38            | 75                 | 59   | 0.33            |
| Smell of mold                                            | 9              | 7                  | 0    | 0.48*           | 7                  | 6    | 1.00*           |
| Unpleasant odour                                         | 17             | 40                 | 19   | 0.25*           | 38                 | 24   | 0.47*           |
| Environmental tobacco smoke                              | 4              | 0                  | 0    | -               | 13                 | 0    | 0.23*           |
| Noise                                                    | 17             | 47                 | 56   | 0.59            | 19                 | 50   | 0.06            |
| Dim light or reflections                                 | 14             | 7                  | 13   | 1.00*           | 6                  | 0    | 0.49*           |
| Dust or dirt                                             | 25             | 27                 | 25   | 1.00*           | 25                 | 35   | 0.71*           |
| <b>Work regarded as interesting and stimulating (%)</b>  |                |                    |      |                 |                    |      |                 |
| Often                                                    | 75             | 73                 | 88   | 0.39*           | 88                 | 82   | 1.00*           |
| Sometimes                                                | 20             | 27                 | 13   |                 | 13                 | 18   |                 |
| Seldom or never                                          | 4              | 0                  | 0    |                 | 0                  | 0    |                 |
| <b>Too much work to do (%)</b>                           |                |                    |      |                 |                    |      |                 |
| Often                                                    | 20             | 0                  | 13   | 0.08*           | 13                 | 18   | 0.70*           |
| Sometimes                                                | 59             | 40                 | 63   |                 | 56                 | 65   |                 |
| Seldom or never                                          | 21             | 60                 | 25   |                 | 31                 | 18   |                 |
| <b>Opportunity to influence work conditions (%)</b>      |                |                    |      |                 |                    |      |                 |
| Often                                                    | 35             | 27                 | 25   | 0.51*           | 25                 | 24   | 0.58*           |
| Sometimes                                                | 44             | 60                 | 75   |                 | 63                 | 47   |                 |
| Seldom or never                                          | 21             | 13                 | 0    |                 | 13                 | 29   |                 |
| <b>Fellow workers help with problems in the work (%)</b> |                |                    |      |                 |                    |      |                 |
| Often                                                    | 72             | 87                 | 88   | 1.00*           | 88                 | 76   | 0.05*           |
| Sometimes                                                | 22             | 13                 | 13   |                 | 0                  | 24   |                 |
| Seldom or never                                          | 6              | 0                  | 0    |                 | 13                 | 0    |                 |
| <b>Allergic diseases (%)</b>                             |                |                    |      |                 |                    |      |                 |
| Asthma                                                   | 8              | 0                  | 0    | -               | 19                 | 18   | 1.00*           |
| Hay fever                                                | 38             | 67                 | 56   | 0.55*           | 50                 | 41   | 0.61            |
| Atopic eczema                                            | 28             | 40                 | 19   | 0.25*           | 13                 | 12   | 1.00*           |
| <b>Stress (%)</b>                                        |                |                    |      |                 |                    |      |                 |
| Very much                                                | 10             | 7                  | 0    | 0.45*           | 13                 | 24   | 0.74*           |
| Some                                                     | 28             | 27                 | 47   |                 | 50                 | 35   |                 |
| None/only a little                                       | 63             | 67                 | 53   |                 | 38                 | 41   |                 |
| <b>Symptoms (%)</b>                                      |                |                    |      |                 |                    |      |                 |
| Fatigue                                                  | 16             | 7                  | 19   | 0.60*           | 19                 | 29   | 0.69*           |
| Heavy-headedness                                         | 9              | 20                 | 13   | 0.65*           | 6                  | 35   | 0.09*           |
| Headache                                                 | 7              | 13                 | 6    | 0.60*           | 19                 | 29   | 0.69*           |
| Difficulty concentrating                                 | 3              | 0                  | 6    | 1.00*           | 6                  | 18   | 0.60*           |
| Eye irritation                                           | 17             | 27                 | 31   | 1.00*           | 20                 | 41   | 0.27*           |
| Irritated, stuffy, or running nose                       | 20             | 13                 | 25   | 0.65*           | 19                 | 35   | 0.44*           |
| Hoarse/dry throat                                        | 14             | 13                 | 38   | 0.22*           | 31                 | 35   | 0.81            |
| Cough                                                    | 5              | 0                  | 13   | 0.48*           | 6                  | 18   | 0.60*           |
| Cough disturbing sleep                                   | 1              | 0                  | 6    | 1.00*           | 0                  | 0    | -               |
| Dry or flushed facial skin                               | 11             | 7                  | 25   | 0.33*           | 13                 | 25   | 0.65*           |
| Hands: dry, itching, red skin                            | 15             | 0                  | 19   | 0.23*           | 7                  | 24   | 0.34*           |
| Shortness of breath                                      | 3              | 7                  | 0    | 0.48*           | 0                  | 6    | 1.00*           |
| Wheezing                                                 | 1              | 7                  | 0    | 0.48*           | 0                  | 6    | 1.00*           |
| Fever or chills                                          | 2              | 0                  | 0    | -               | 7                  | 6    | 1.00*           |
| Joint pain                                               | 3              | 0                  | 0    | -               | 0                  | 0    | -               |
| Muscular pain                                            | 4              | 0                  | 0    | -               | 0                  | 0    | -               |
| Other                                                    |                | 0                  | 0    | -               | 9                  | 12   | 0.83*           |

Statistically significant changes at a 10% confidence interval ( $p < 0.1$ ) are bolded. The p-values marked with \* were determined by the Fisher's exact test (SPSS). Reference data are based on analysis of the comprehensive questionnaire data collected by FIOH.
